# Supplementary material for: Relating X-ray photoelectron spectroscopy data to chemical bonding in MXenes
Source: Royal Society of Chemistry journal article supplement (doi:10.1039/d0na01033b), 2021-01-01
Supplement: d0na01033b1.pdf [file d0na01033b1.pdf]

## Electronic Supplementary Information (ESI)

# Relating X-Ray Photoelectron Spectroscopy Data to Chemical Bonding in MXenes

Néstor García-Romeral,<sup>a</sup> Masoomeh Keyhanian,<sup>a,b</sup> Ángel Morales-García,<sup>a</sup> Francesc Illas<sup>a\*</sup>

<sup>a</sup>Departament de Ciència de Materials i Química Física & Institut de Química Teòrica i Computacional (IQTUB), Universitat de Barcelona, c/Martí i Franquès 1-11,  
08028 Barcelona, Spain

<sup>b</sup>Department of Physical Chemistry, Faculty of Chemistry, University of Mazandaran, Babolsar 47416-95447, Iran

e-mail: [francesc.illas@ub.edu](mailto:francesc.illas@ub.edu)

**Table S1.** Experimental results of XPS analysis in MXenes. Bold numbers are selected to compare and discuss our theoretical predictions.

| MXene                                                   | Region | Binding energy (eV)                     | Asignation                                                                                                                                      | Ref |
|---------------------------------------------------------|--------|-----------------------------------------|-------------------------------------------------------------------------------------------------------------------------------------------------|-----|
| Nb <sub>2</sub> CT <sub>z</sub>                         | O (1s) | 530.0<br><b>531.8</b><br>532.4          | O in Nb <sub>2</sub> O <sub>5</sub><br><b>O/HO-Nb<sub>2</sub>C</b><br>Water trapped between MXene layer                                         | [1] |
|                                                         | C (1s) | <b>281.8</b><br>282.0<br>283.6          | <b>C in Nb<sub>2</sub>C</b><br>Non-stoichiometric C in Nb <sub>2</sub> C<br>Adventitious contamination                                          |     |
| V <sub>2</sub> CT <sub>z</sub>                          | O (1s) | 529.9<br><b>531.3</b><br>532.9          | Mixed VO <sub>x</sub> and surface oxide groups<br><b>Mixed VO<sub>x</sub> and surface oxide groups</b><br>Water trapped between MXene layer     | [1] |
|                                                         | C (1s) | <b>281.8</b><br>286.1<br>284.5<br>288.3 | <b>C in V<sub>2</sub>C</b><br>Adventitious contamination<br>Adventitious contamination<br>Adsorbed methanol                                     |     |
| Ti <sub>2</sub> CT <sub>z</sub><br>before<br>sputtering | O (1s) | <b>531.1</b><br>532.0<br>533.1          | <b>C-Ti-O<sub>z</sub></b><br>C-Ti-(OH) <sub>z</sub><br>Water trapped between MXene layer                                                        | [2] |
|                                                         | C (1s) | <b>281.9</b><br>286.2<br>289.0          | <b>C-Ti-T<sub>z</sub></b><br>C-O<br>C-OO                                                                                                        |     |
| Ti <sub>2</sub> CT <sub>z</sub><br>after<br>sputtering  | O (1s) | <b>531.3</b><br>532.2<br>533.5          | <b>C-Ti-O<sub>z</sub></b><br>C-Ti-(OH) <sub>z</sub><br>Water trapped between MXene layer                                                        |     |
|                                                         | C (1s) | <b>281.9</b><br>286.2                   | <b>C-Ti-T<sub>z</sub></b><br>C-O                                                                                                                |     |
| Mo <sub>2</sub> CT <sub>z</sub>                         | O (1s) | <b>531.1</b><br>532.2<br>533.4          | <b>Mo<sub>2</sub>CO<sub>x</sub> (-O terminated)</b><br>Mo <sub>2</sub> C(OH) <sub>x</sub> (-OH terminated)<br>Water trapped between MXene layer | [3] |
|                                                         | C (1s) | <b>283.1</b>                            | <b>Mo-C species</b>                                                                                                                             |     |
| MultiLayered<br>Cr <sub>2</sub> CT <sub>z</sub>         | O (1s) | 530.2<br>531.2                          | <b>O-Cr-C (-O terminated)</b><br>HO-Cr-C                                                                                                        | [4] |
|                                                         | C (1s) | 283.2                                   | <b>C-Cr-T<sub>z</sub></b>                                                                                                                       |     |
| FewLayered<br>Cr <sub>2</sub> CT <sub>z</sub>           | O (1s) | <b>530.4</b><br>531.6                   | <b>O-Cr-C (-O terminated)</b><br>HO-Cr-C                                                                                                        | [4] |
|                                                         | C (1s) | <b>283.5</b>                            | <b>C-Cr-T<sub>z</sub></b>                                                                                                                       |     |

**Table S2.** Kohn-Sham orbital energy ( $\epsilon_{1s}$ ), Fermi energy ( $\epsilon_F$ ), initial state C(1s) CLBE relative to the Fermi energy of each system (see Eq. 2) and net charge on the C atom ( $Q_C$ ) of partial relaxed O-terminated  $M_2CO_2$  MXenes. The number of d electrons in the corresponding metal ( $d^n$ ) is also provided. The units of energetic parameters ( $\epsilon_{1s}$ ,  $\epsilon_F$ , and C(1s) CLBE) are in eV, whereas  $Q_C$  units are |e|. Note that the O layers are relaxed maintaining the  $M_2C$  fixed at the clean MXene.

| <b>MXene</b>                    | <b><math>d^n</math></b> | <b><math>\epsilon_{1s}</math></b> | <b><math>\epsilon_F</math></b> | <b>CLBE</b> | <b><math>Q_C</math></b> |
|---------------------------------|-------------------------|-----------------------------------|--------------------------------|-------------|-------------------------|
| Ti <sub>2</sub> CO <sub>2</sub> | d <sup>2</sup>          | -267.8                            | -3.6                           | 264.2       | -1.9                    |
| Zr <sub>2</sub> CO <sub>2</sub> |                         | -265.6                            | -2.0                           | 263.6       | -1.9                    |
| Hf <sub>2</sub> CO <sub>2</sub> |                         | -265.2                            | -1.5                           | 263.7       | -1.9                    |
| V <sub>2</sub> CO <sub>2</sub>  | d <sup>3</sup>          | -268.0                            | -2.7                           | 265.3       | -1.6                    |
| Nb <sub>2</sub> CO <sub>2</sub> |                         | -267.6                            | -2.0                           | 265.6       | -1.8                    |
| Ta <sub>2</sub> CO <sub>2</sub> |                         | -267.4                            | -1.6                           | 265.8       | -2.1                    |
| Cr <sub>2</sub> CO <sub>2</sub> | d <sup>4</sup>          | -267.7                            | -2.2                           | 265.5       | -1.3                    |
| Mo <sub>2</sub> CO <sub>2</sub> |                         | -268.3                            | -1.7                           | 266.6       | -1.4                    |
| W <sub>2</sub> CO <sub>2</sub>  |                         | -267.3                            | -1.5                           | 265.8       | -1.5                    |

**Table S3.** Kohn-Sham orbital energy ( $\epsilon_{1s}$ ), Fermi energy ( $\epsilon_F$ ), initial state O(1s) CLBE relative to the Fermi energy of each system (see Eq. 2) and net charge on the O atom ( $Q_O$ ) of partial relaxed O-terminated  $M_2CO_2$  MXenes. The number of d electrons in the corresponding metal ( $d^n$ ) is also provided. The units of energetic parameters ( $\epsilon_{1s}$ ,  $\epsilon_F$ , and O(1s) CLBE) are in eV, whereas  $Q_O$  units are |e|. Note that the O layers are relaxed maintaining the  $M_2C$  fixed at the clean MXene.

| <b>MXene</b>                    | <b><math>d^n</math></b> | <b><math>\epsilon_{1s}</math></b> | <b><math>\epsilon_F</math></b> | <b>CLBE</b> | <b><math>Q_o</math></b> |
|---------------------------------|-------------------------|-----------------------------------|--------------------------------|-------------|-------------------------|
| Ti <sub>2</sub> CO <sub>2</sub> | d <sup>2</sup>          | -508.8                            | -3.6                           | 505.2       | -1.0                    |
| Zr <sub>2</sub> CO <sub>2</sub> |                         | -507.4                            | -2.0                           | 505.4       | -1.2                    |
| Hf <sub>2</sub> CO <sub>2</sub> |                         | -507.0                            | -1.5                           | 505.5       | -1.3                    |
| V <sub>2</sub> CO <sub>2</sub>  | d <sup>3</sup>          | -508.8                            | -2.7                           | 506.1       | -1.0                    |
| Nb <sub>2</sub> CO <sub>2</sub> |                         | -508.3                            | -2.0                           | 506.3       | -1.1                    |
| Ta <sub>2</sub> CO <sub>2</sub> |                         | -508.2                            | -1.6                           | 506.6       | -1.2                    |
| Cr <sub>2</sub> CO <sub>2</sub> | d <sup>4</sup>          | -508.7                            | -2.2                           | 506.5       | -0.9                    |
| Mo <sub>2</sub> CO <sub>2</sub> |                         | -508.6                            | -1.7                           | 506.9       | -0.9                    |
| W <sub>2</sub> CO <sub>2</sub>  |                         | -508.2                            | -1.5                           | 506.7       | -1.0                    |

## REFERENCES

- 1 M. Naguib, J. Halim, J. Lu, K. M. Cook, L. Hutman, Y. Gogotsi, and M. W. Barsoum, *J. Am. Chem. Soc.* **2013**, *135*, 15966-15969.
- 2 J. Halim, K. M. Cook, M. Naguib, P. Eklund, Y. Gogotsi, J. Rosen, and M. W. Barsoum, *Appl. Surf. Sci.* **2016**, *362*, 406-417.
- 3 J. Halim, S. Kota, M. R. Lukatskaya, M. Naguib, M.-Q. Zhao, E. J. Moon, J. Pitoock, J. Nanda, S. J. May, Y. Gogotsi, and M. W. Barsoum, *Adv. Funct. Mater.* **2016**, *26*, 3118-3127.
- 4 B. Soundiraraju, R. Raghavan, and B. K. George, *ACS Appl. Nano Mater.* **2020**, *3*, 11007-11016.
